# Supplementary material for: Salts of 4-aminobutyric acid and 6-aminohexanoic acid behaving as molecular Velcro
Source: Royal Society of Chemistry journal article supplement (doi:10.1039/c7ce01597f), 2017-01-01

## Supplementary Information

### Calculated and Experimental Powder Patterns

Experimental X-ray powder patterns of the bulk samples are compared with powder patterns calculated from the single crystal structures reported, to determine if the single crystal selected for single crystal X-ray diffraction is representative of the bulk sample. The experimental powder patterns are shown in black, while the calculated patterns are given in red.

#### 1: C<sub>4</sub>Cl

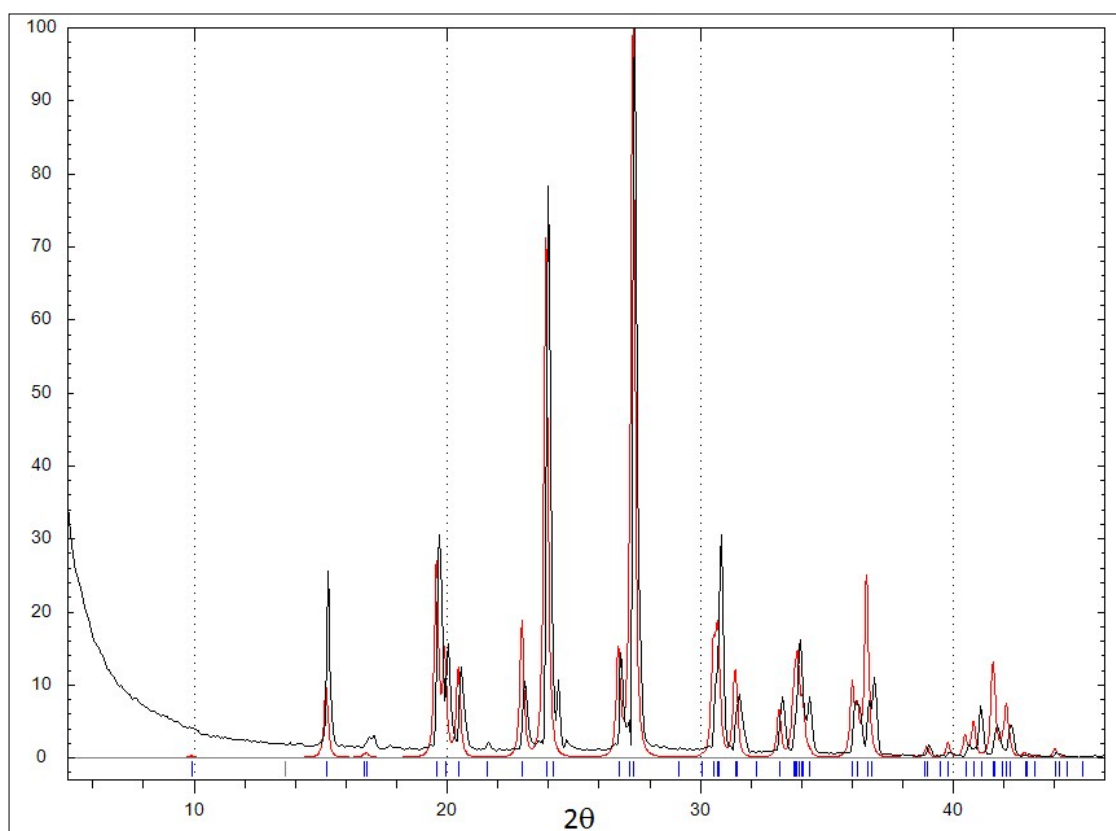

## 2: C4Br

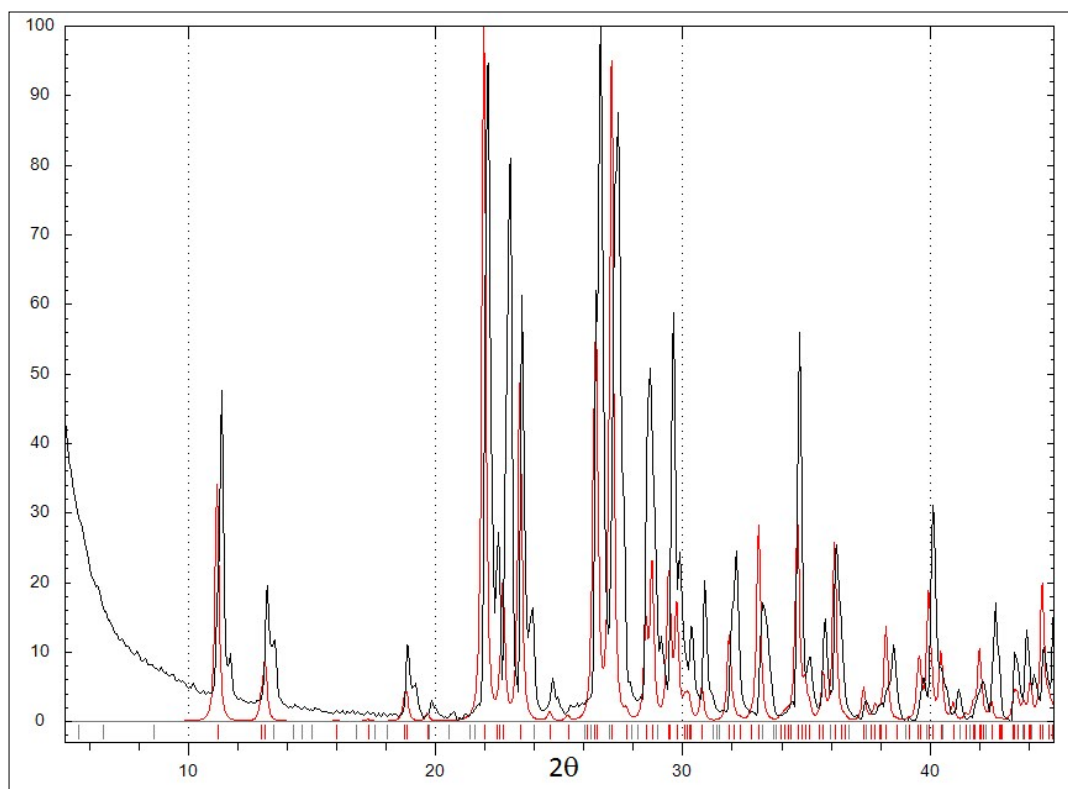

## 3: C4I

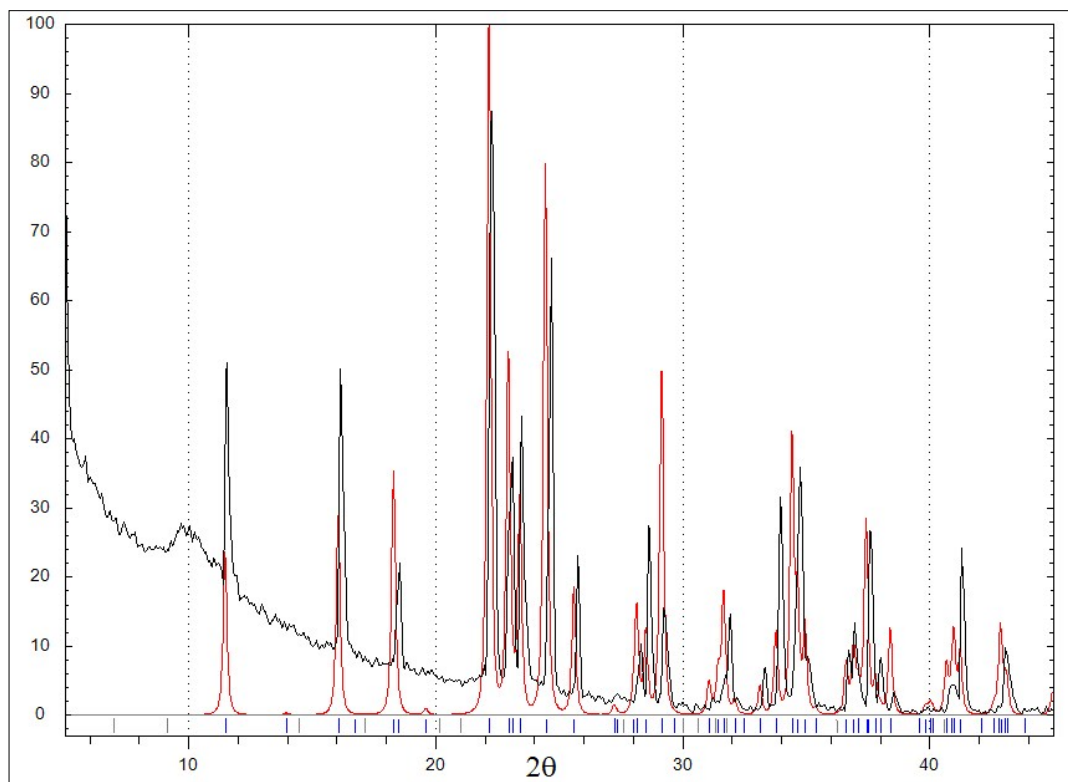

#### 4: C6Cl

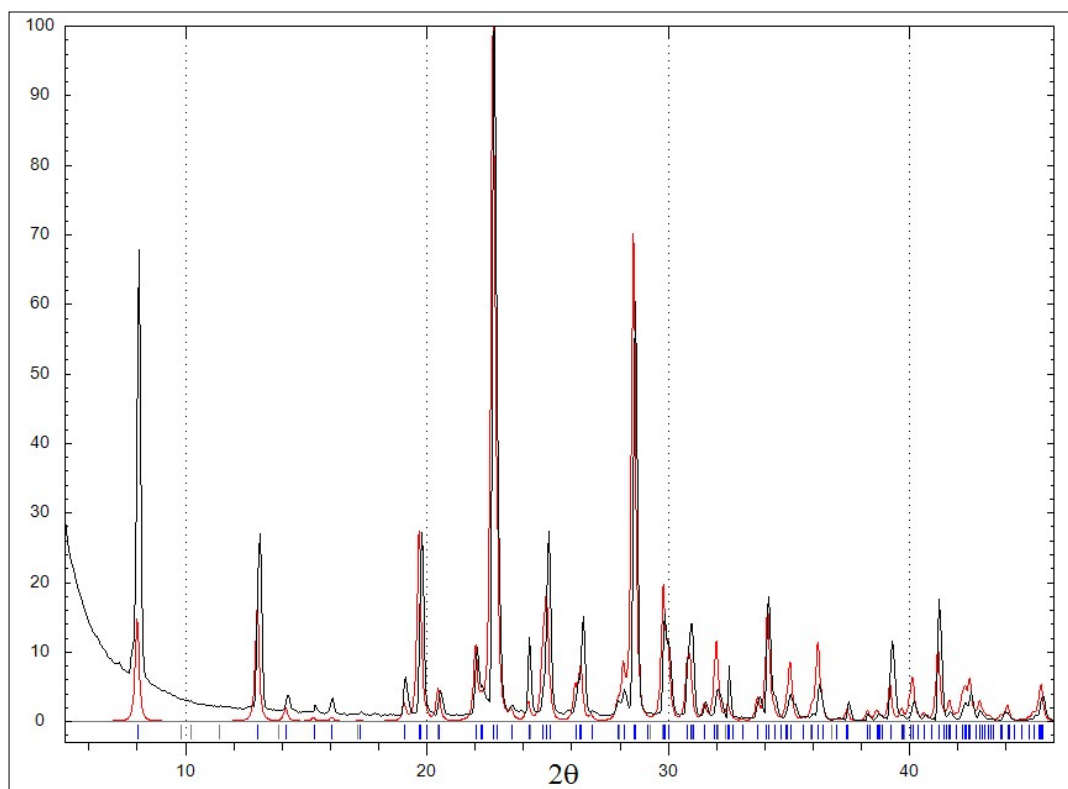

#### 5: C6Br.0.5H<sub>2</sub>O

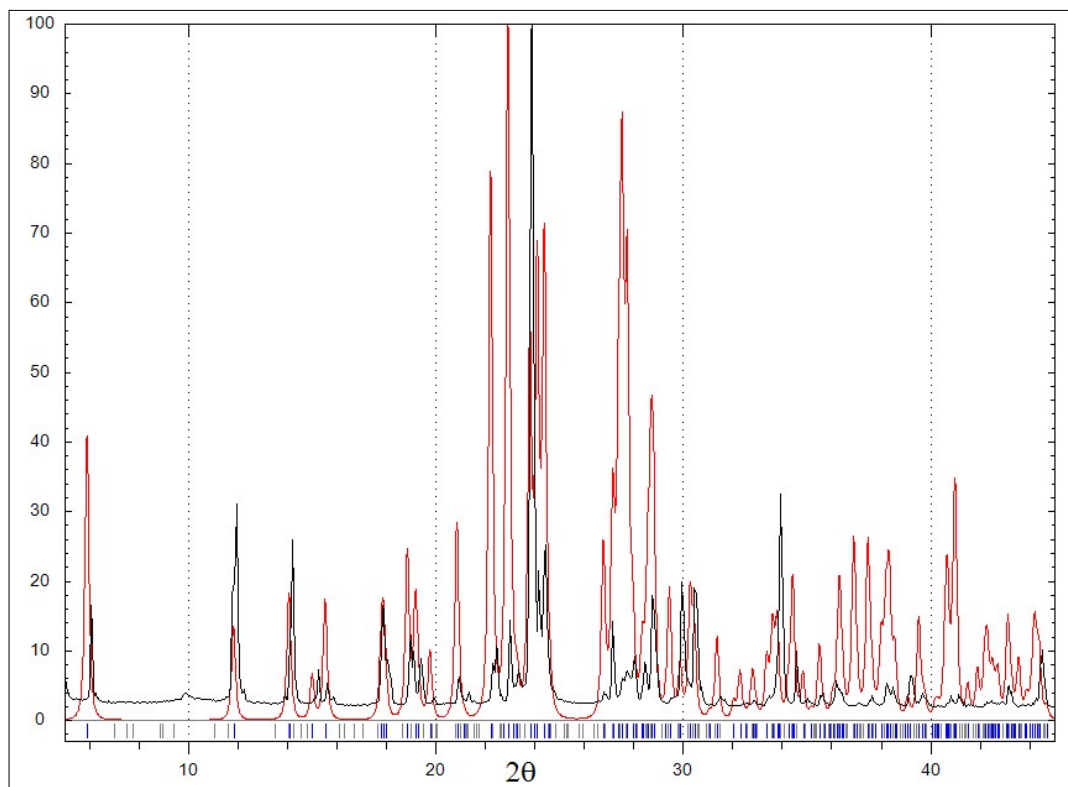

**6: C<sub>6</sub>I<sub>0.5</sub>H<sub>2</sub>O**

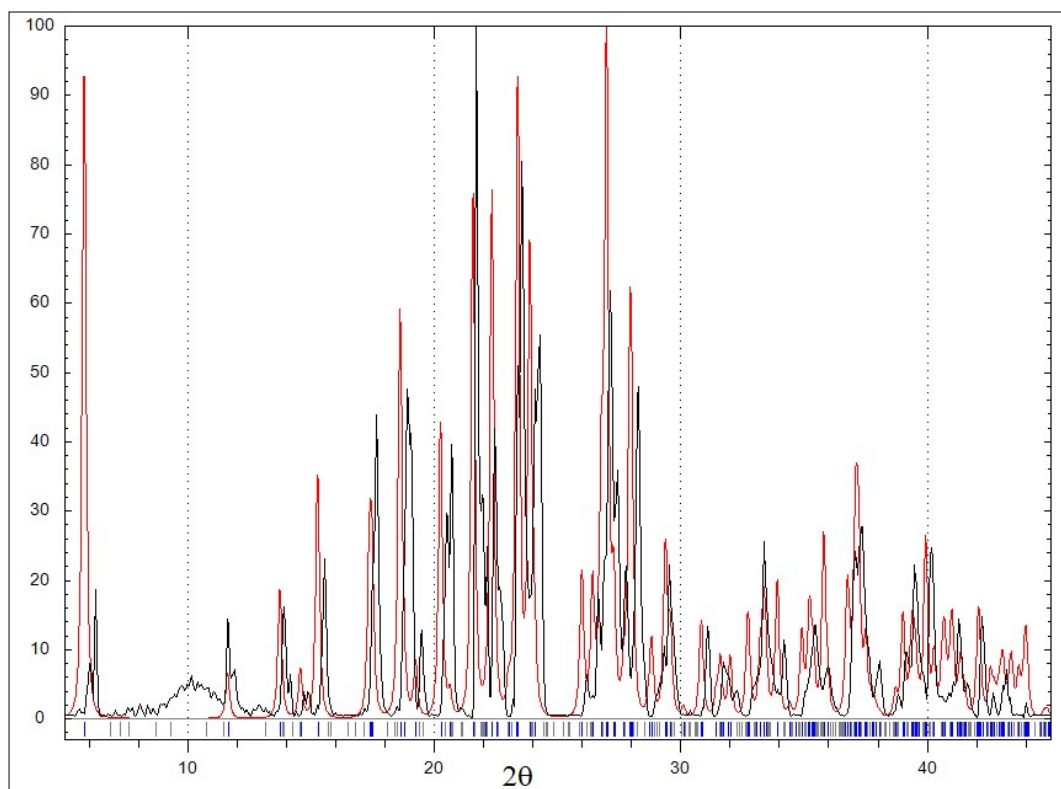

**7: C<sub>6</sub>NO<sub>3</sub>**

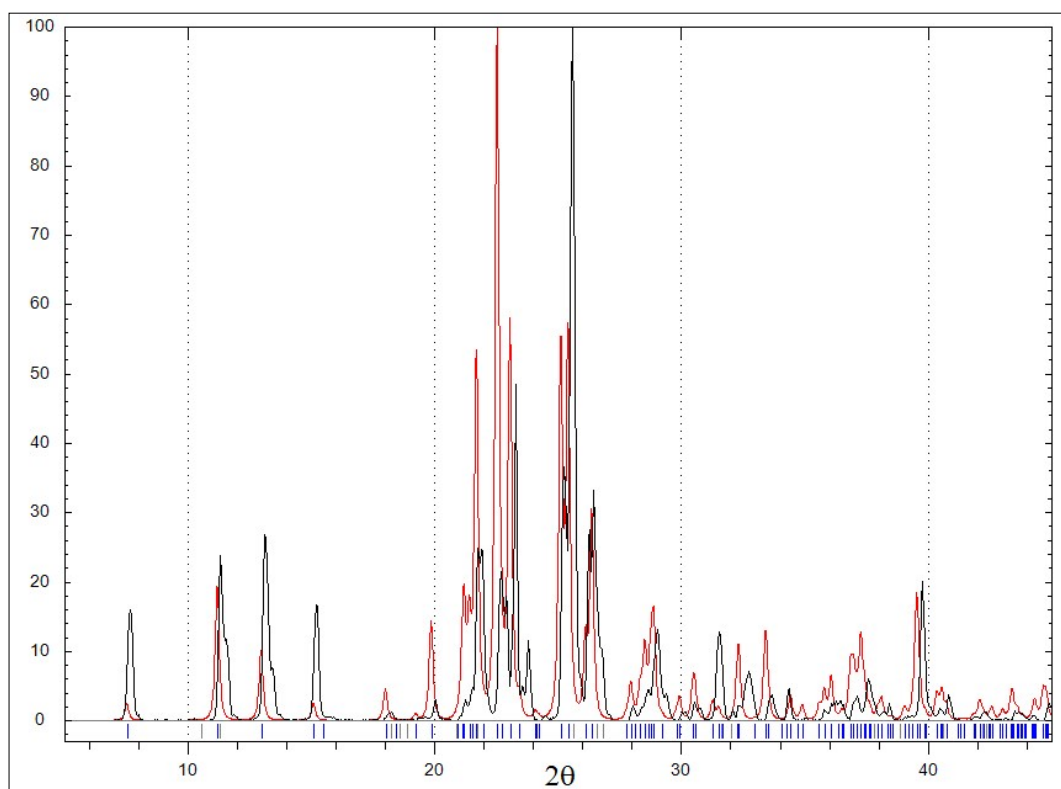

8: C6ClO<sub>4</sub>

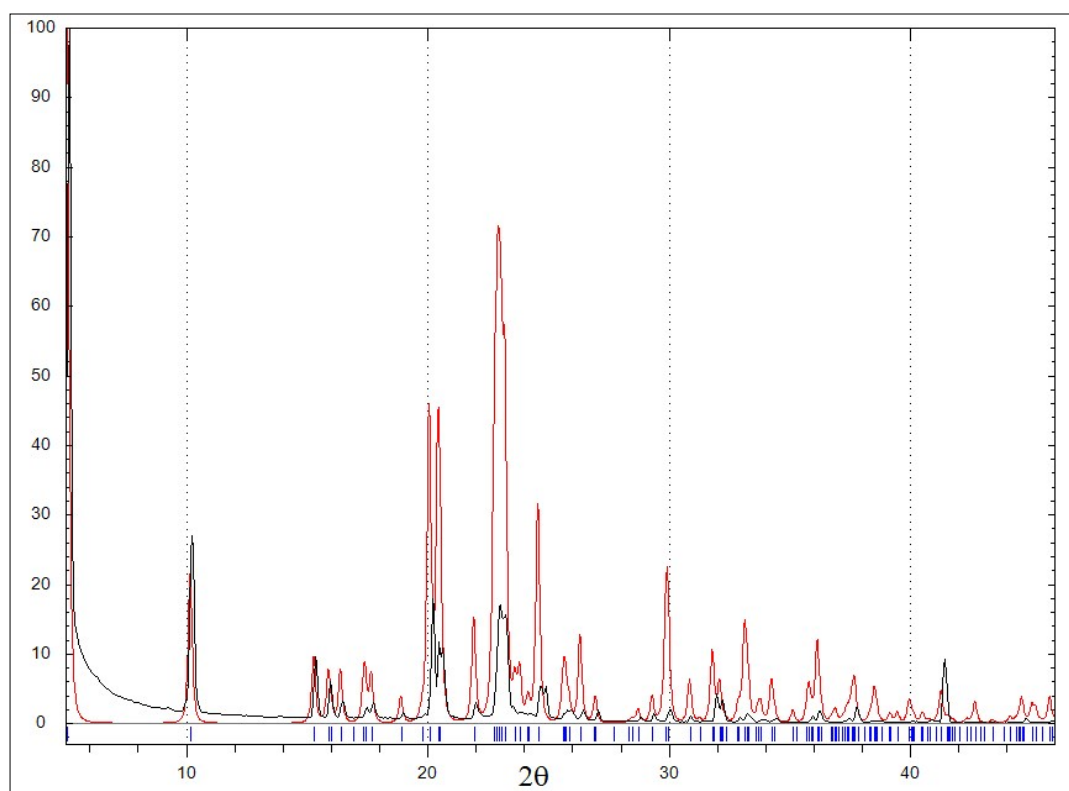

Supplement: c7ce01597f1.pdf [file c7ce01597f1.pdf]
